# Supplementary material
Source: PubMed Central journal article supplement (PMC5625385)
Supplement: JCM.00921-17_zjm999095654s1.pdf [file JCM.00921-17_zjm999095654s1.pdf]

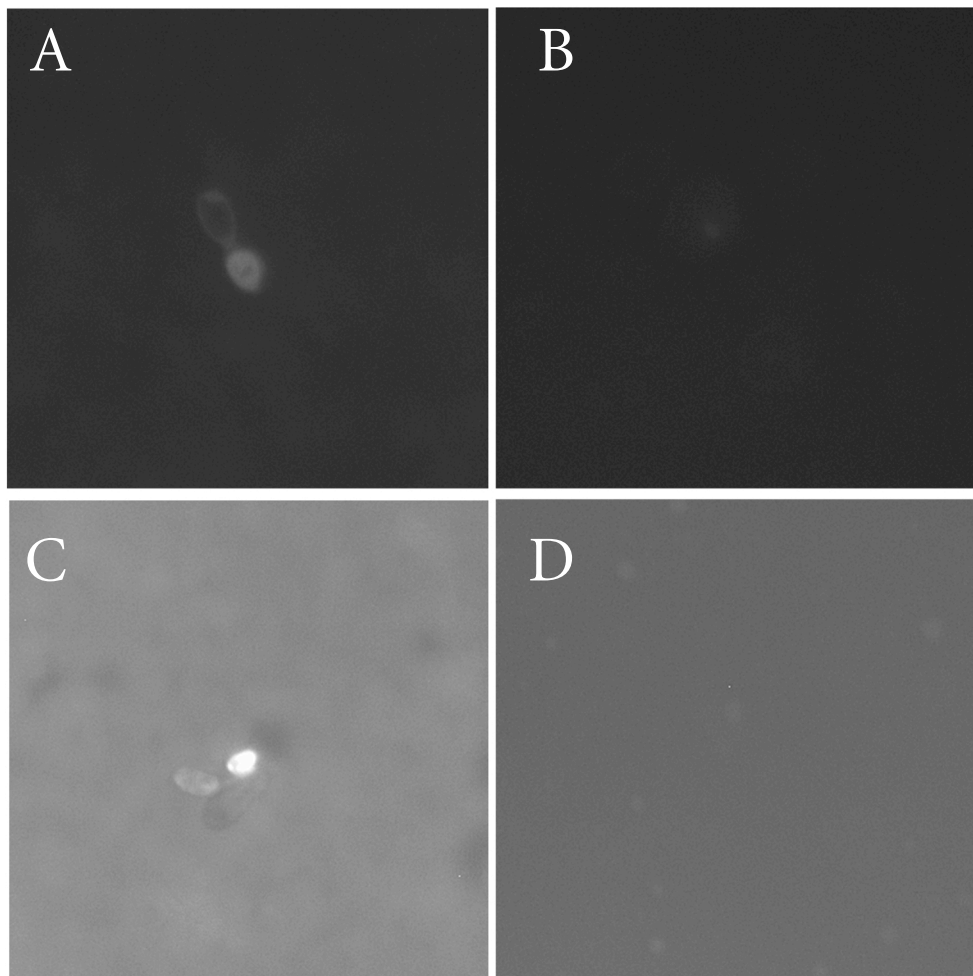

Figure S1. Images of the validations of the esterase activity stain used in solid-phase cytometer viability assay. Live and chemically fixed formalin killed cells were processed using the ScanRDI sample preparation protocol A) Viable *C. parapsilosis* cells with detectable esterase activity, B) formalin killed *C. parapsilosis* cells, C) viable *C. auris* cells with detectable esterase activity, and D) formalin killed *C. auris* cells.
