# Supplementary material
Source: PubMed Central journal article supplement (PMC5625385)
Supplement: JCM.00921-17_zjm999095654s2.pdf [file JCM.00921-17_zjm999095654s2.pdf]

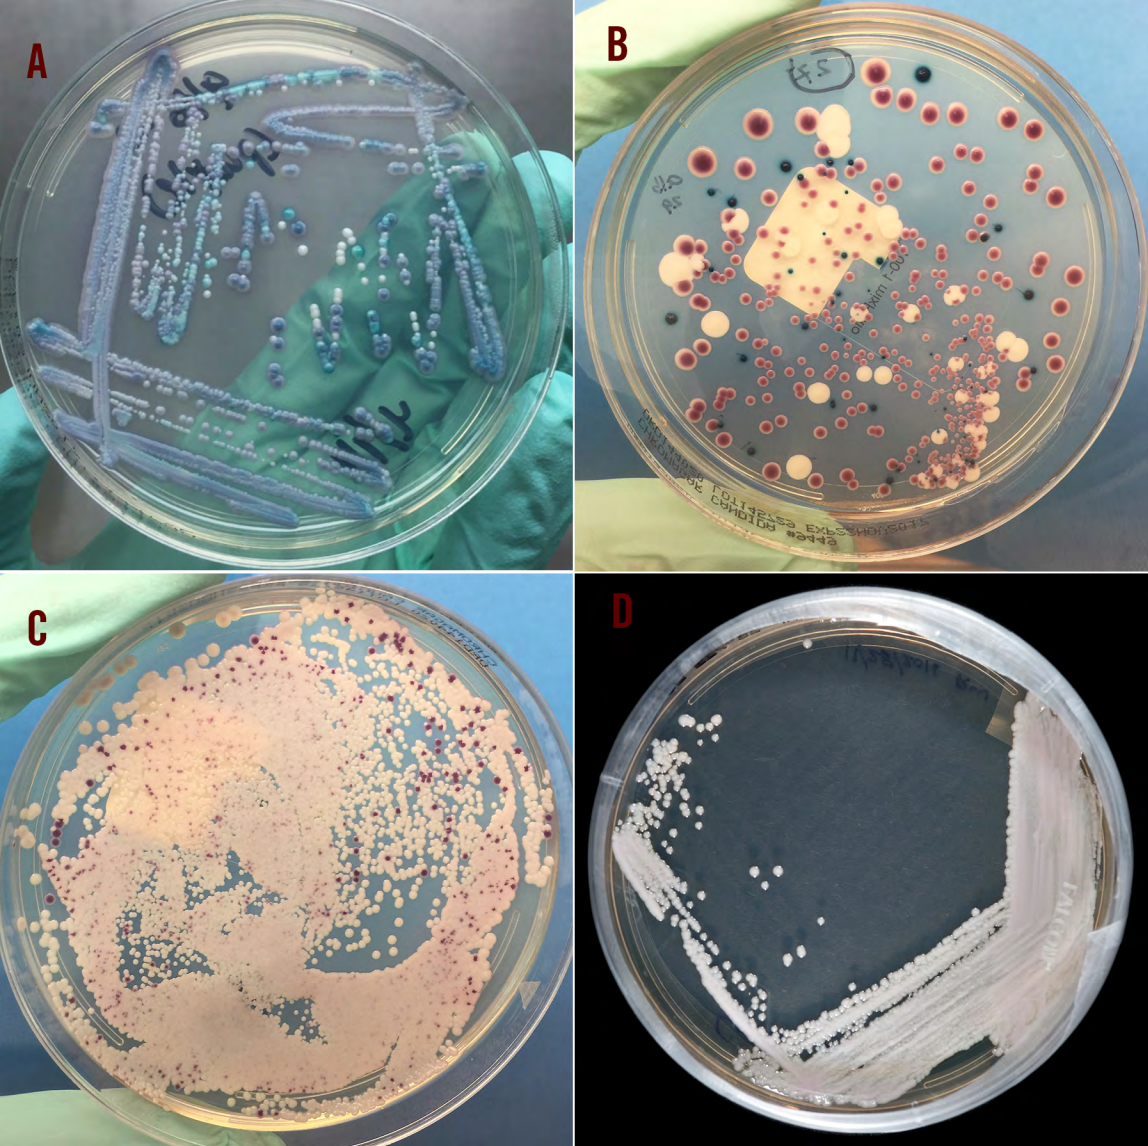

**Figure S2. Candida Species on Chromagar Candida Chromogenic Agar Plates**

Clockwise from top left: a) patient swab streaked out for isolation; multiple species of *Candida* are present. The center of the plate has a few representatives of the type of colony that need to be isolated for identification (all pale, pink, or red colonies from the plate should be selected for identification), b) mixed culture of *C. albicans* (green), *C. glabrata* (purple), and *C. auris* (pale pink), c) same mixed culture of *C. albicans* (absent/ growth suppressed), *C. glabrata* (purple), and *C. auris* (pale pink), after 72 hours in the enrichment broth, and d) *C. auris* isolate from clade I (South Asia).
