# Supplementary material
Source: PubMed Central journal article supplement (PMC5625385)
Supplement: JCM.00921-17_zjm999095654s3.pdf [file JCM.00921-17_zjm999095654s3.pdf]

**Table S1** Comparison of *Candida auris* and *C. parapsilosis* inoculum concentration and time zero cell recovery on plastic carriers. Inoculum converted to cells per 10µl for comparison of time zero plastic coupons inoculated with 10µl

| Organism(s)            | <b>CFU mean and standard deviation</b>             |                                                                                | <b>p-value</b>                            |
|------------------------|----------------------------------------------------|--------------------------------------------------------------------------------|-------------------------------------------|
|                        | Viable cells in the inoculum as CFU<br>(mean ± SD) | Viable cells recovered from plastic coupons at time zero as CFU<br>(mean ± SD) | T-Test calculated for 2 independent means |
| <i>C. auris</i>        | 65,100<br>± 16,278                                 | 69,967<br>± 4,517                                                              | 0.491109                                  |
| <i>C. parapsilosis</i> | 53,800<br>± 9,016                                  | 59,883<br>± 7,968                                                              | 0.195046                                  |
